# Supplementary material for: Evolution of tooth morphological complexity and its association with the position of tooth eruption in the jaw in non-mammalian synapsids
Source: PeerJ. 2024 Aug 12;12:e17784. doi: 10.7717/peerj.17784 (PMC11326432; doi:10.7717/peerj.17784)
Supplement: Supplemental Information 2 [file peerj-12-17784-s002.xlsx]

## Sheet: Dataset S1
Dataset S1
List of the references for illustrations or images of the cranium and teeth of synapsid taxa used in this study.
	Reference
Taxon	Cranium	Teeth
Aelurognathus tigriceps	Kammerer (2016)	Kammerer (2016)
Andescynodon mendozensis	Liu & Powell (2009)	Liu & Powell (2009)
Annatherapsidus petri	Ivakhnenko (2011)	Ivakhnenko (2011)
Anteosaurus	Boonstra (1969)	Boonstra (1969)
Arctognathus	Kemp (1969)	Kemp (1969)
Bauria cynops	Kemp (2005)	Gow (1978)
Biarmosuchus tener	Amson & Laurin (2011)	Kemp (2005)
Bocatherium	Clark & Hopson (1985)	Clark & Hopson (1985)
Brasilodon quadrangularis	Bonaparte et al. (2005)	Bonaparte et al. (2003)
Chiniquodon	Lautenschlager et al. (2017)	Martinelli et al. (2017)
Clelandina rubidgei	Kammerer (2016)	Kammerer (2016)
Cotylorhynchus romeri	Reisz et al. (2022)	Reisz et al. (2022)
Cynognathus	Hopson & Kitching (2001)	Broom (1911); Martinelli & Soares (2016)
Dadadon isaloi	Ranivoharimanana et al. (2011)	Ranivoharimanana et al. (2011)
Diademodon tetragonus	Hopson & Kitching (2001)	Seeley (1894)
Dicynodon	Boonstra (1969)	Boonstra (1969)
Dimetrodon limbatus	Amson & Laurin (2011)	Amson & Laurin (2011)
Dinogorgon rubidgei	Kammerer (2016)	Kammerer (2016)
Dvinia prima	Tatarinov (1968)	Tatarinov (1968)
Edaphosaurus boanerges	Modesto (1995)	Kemp (2005)
Eodicynodon oosthuizeni	Rubidge (1990)	Rubidge (1990); Kemp (2005)
Ericiolacerta parva	Crompton (1962)	Watson (1931)
Estemmenosuchus uralensis	Kemp (2005)	Kemp (2005)
Euromycter rutenus	Sigogneau–Russell & Russel (1974)	Sigogneau–Russell & Russel (1974); Kemp (2005)
Exaeretodon riograndensis	Abdala et al. (2002)	Abdala et al. (2002)
Glanosuchus	Boonstra (1969)	Boonstra (1969)
Gorgonops torvus	Amson & Laurin (2011)	Manten (1959)
Hadrocodium wui	Lautenschlager et al. (2017)	Luo et al. (2001); Lautenschlager et al. (2017)
Haldanodon exspectatus	Kielan-Jaworowska et al. (2004)	Kielan-Jaworowska et al. (2004)
Ictidosuchops intermedius	Kemp (2005)	Crompton (1955)
Inostrancevia alexandri	Gebauer (2007)	Gebauer (2007)
Jonkeria	Boonstra (1969)	Boonstra (1969)
Karenites ornamentatus	Ivakhnenko (2011)	Ivakhnenko (2011)
Kayentatherium	Kemp (2005)	Kemp (2005); Hoffman & Rowe (2018)
Leontosaurus vanderhorsti	Kammerer (2016)	Kammerer (2016)
Lumkuia fuzzi	Kemp (2005)	Hopson & Kitching (2001)
Massetognathus ochagaviae	Liu et al. (2008)	Liu et al. (2008)
Morganucodon	Sánchez-Villagra (2012)	Hopson (1987); Lautenschlager et al. (2017)
Moschorhinus kitchingi	Durand (1991)	Durand (1991)
Oligokyphus major	Kemp (2005)	Kemp (2005)
Pachygenelus	Kemp (2005)	Gow (1980)
Pascualgnathus polanskii	Martinelli (2010)	Martinelli (2010)
Probainognathus jenseni	Hopson & Kitching (2001)	Romer (1970); Martinelli et al. (2016)
Procynosuchus delaharpeae	Kemp (2005)	Weide et al. (2009)
Pseudotherium argentinus	Wallace et al. (2019)	Wallace et al. (2019)
Rubidgea atrox	Kammerer (2016)	Kammerer (2016)
Ruhuhucerberus haughtoni	Kammerer (2016)	Kammerer (2016)
Sauroctonus progressus	Gebauer (2014)	Gebauer (2014)
Sinoconodon	Crompton & Sun (1985)	Crompton & Sun (1985)
Smilesaurus ferox	Kammerer (2016)	Kammerer (2016)
Styracocephalus	Boonstra (1969)	Boonstra (1969)
Suminia getmanovi	Kemp (2005)	Rybczynski & Reisz (2001)
Sycosaurus laticeps	Kammerer (2016)	Kammerer (2016)
Sycosaurus nowaki	Kammerer (2016)	Kammerer (2016)
Tetraceratops insignis	Amson & Laurin (2011)	Kemp (2005); Amson & Laurin (2011)
Theriognathus	Kemp (2005)	Kemp (2005); Huttenlocker & Abdala (2015)
Thrinaxodon liorhinus	Hopson & Kitching (2001)	Hopson (1987); Hopson & Kitching (2001)
Ulemosaurus svijagensis	Kemp (2005)	Kemp (2005); Ivakhnenko (2001)
Viatkosuchus sumini	Ivakhnenko (2011)	Ivakhnenko (2011)
Yunnanodon	Luo (2001)	Luo (2001)
References
Abdala, F., Barberena, M. C., & Dornelles, J. (2002). A new species of the traversodontid cynodont Exaeretodon from the Santa Maria Formation (Middle/Late Triassic) of southern Brazil. Journal of Vertebrate Paleontology, 22, 313–325.
Amson, E., & Laurin, M. (2011). On the affinities of Tetraceratops insignis, an Early Permian synapsid. Acta Palaeontologica Polonica, 56, 301–312.
Boonstra L. D. (1969). The fauna of the Tapinocephalus zone (Beaufort beds of the Karoo). Annals of the South African Museum, 56, 1–73.
Broom, R. (1911). On the structure of the skull in cynodont reptiles. In Proceedings of the Zoological Society of London (Vol. 81, No. 4, pp. 893–925). Oxford, UK: Blackwell Publishing Ltd.
Bonaparte, J. F., Martinelli, A. G., Schultz, C. L., & Rubert, R. (2003). The sister group of mammals: small cynodonts from the Late Triassic of southern Brazil. Revista Brasileira de paleontologia, 5, 5–27.
Bonaparte, J. F., Martinelli, A. G., & Schultz, C. L. (2005). On the sister–group of mammals: Brasilodon and Brasilitherium (Cynodontia, Probainognathia) from the late Triassic of southern Brazil. Revista Brasileira de Paleontologia, 8, 25–46.
Clark, J. M., & Hopson, J. A. (1985). Distinctive mammal–like reptile from Mexico and its bearing on the phylogeny of the Tritylodontidae. Nature, 315, 398–400.
Crompton, A. W. (1955). A revision of the Scaloposauridae with special reference to kinetism in this family: III: Icyidosuchops Intermedius (Broom) (BPI 267). Navorsinge van die Nasionale Museum: Researches of the National Museum, 1, 151–162.
Crompton, A. W. (1962). On the dentition and tooth replacement in two bauriamorph reptiles. Annals of the South African Museum, 46, 1962, 231–255
Crompton, A. W., & Sun, A. L. (1985). Cranial structure and relationships of the Liassic mammal Sinoconodon. Zoological Journal of the Linnean Society, 85, 99–119.
Durand, J. F. (1991). A revised description of the skull of Moschorhinus (Therapsida, Therocephalia). Annals of the South African Museum, 99, 381–413.
Gebauer, E. V. (2007). Phylogeny and Evolution of the Gorgonopsia with a Special Reference to the Skull and Skeleton of GPIT-RE-7113 ('Aelurognathus?'Parringtoni). PhD thesis, Universität Tübingen.
Gebauer, E. V. (2014). Re-assessment of the taxonomic position of the specimen GPIT/RE/7113 (Sauroctonus parringtoni comb. nov., Gorgonopsia). In: Kammerer CF, Angielczyk KD, Fröbisch J, eds. Early evolutionary history of the Synapsida. Dordrecht: Springer Netherlands, 185–207.
Gow, C. E. (1978). The advent of herbivory in certain reptilian lineages during the Triassic.Palaeontologia africana, 21,133–141
Gow, C. E. (1980). The dentitions of the Tritheledontidae (Therapsida: Cynodontia). Proceedings of the Royal Society of London. Series B. Biological Sciences, 208, 461–481.
Hoffman, E. A., & Rowe, T. B. (2018). Jurassic stem–mammal perinates and the origin of mammalian reproduction and growth. Nature, 561, 104–108.
Hopson, J. A. (1987). The mammal–like reptiles: a study of transitional fossils. The American Biology Teacher, 49, 16–26.
Hopson, J. A., & Kitching, J. W. (2001). A probainognathian cynodont from South Africa and the phylogeny of nonmammalian cynodonts. Bulletin of the Museum of Comparative Zoology, 156, 5–35.
Huttenlocker, A. K., & Abdala, F. (2015). Revision of the first therocephalian, Theriognathus Owen (Therapsida: Whaitsiidae), and implications for cranial ontogeny and allometry in nonmammaliaform eutheriodonts. Journal of Paleontology, 89, 645–664.
Ivakhnenko, M. F. (2001). Tetrapods from the East-European Placket-Late Paleozoic natural territorial complex. Trudy Paleontologicheskogo Instituta, Akademiya Nauk SSSR, 283, 1–200. (in Russian)
Ivakhnenko, M. F. (2011). Permian and Triassic therocephals (Eutherapsida) of eastern Europe. Paleontological Journal, 45, 981–1144.
Jun, L., Soares, M. B., & Reichel, M. (2008). Massetognathus (Cynodontia, Traversodontidae) from the Santa Maria Formation of Brazil. Revista brasileira de paleontologia, 11, 27–36.
Kammerer, C. F. (2016). Systematics of the Rubidgeinae (Therapsida: Gorgonopsia). PeerJ, 4, e1608.
Kemp, T. S. (1969). On the functional morphology of the gorgonopsid skull. Philosophical Transactions of the Royal Society of London B, Biological Sciences, 256, 1–83.
Kemp, T. S. (2005). The origin and evolution of mammals. Oxford University Press.
Kielan-Jaworowska, Z., Cifelli, R. L., & Luo, Z. X. (2004). Mammals from the age of dinosaurs: origins, evolution, and structure. Columbia University Press.
Lautenschlager, S., Gill, P., Luo, Z. X., Fagan, M. J., & Rayfield, E. J. (2017). Morphological evolution of the mammalian jaw adductor complex. Biological Reviews, 92, 1910–1940.
Liu, J., & Powell, J. (2009). Osteology of Andescynodon (Cynodontia: Traversodontidae) from the Middle Triassic of Argentina. American Museum Novitates, 3674, 1–19.
Liu, J., Soares, M. B., & Reichel, M. (2008). Massetognathus (Cynodontia, Traversodontidae) from the Santa Maria Formation of Brazil. Revista brasileira de paleontologia, 11, 27–36.
Luo, Z. X. (2001). The inner ear and its bony housing in tritylodontids and implications for evolution of the mammalian ear. Bulletin of the Museum of Comparative Zoology, 156, 81–97.
Luo, Z. X., Crompton, A. W., & Sun, A. L. (2001). A new mammaliaform from the early Jurassic and evolution of mammalian characteristics. Science, 292, 1535–1540.
Manten, A. A. (1959). Two new gorgonopsian skulls. Palaeontologia Africana, 6, 51–76.
Martinelli, A. G. (2010). On the postcanine dentition of Pascualgnathus polanskii Bonaparte (Cynodontia, Traversodontidae) from the Middle Triassic of Argentina. Geobios, 43, 629–638.
Martinelli, A. G. & Soares, M. B., (2016) Evolution of South American non–mammaliaform cynodonts (Therapsida, Cynodontia). Contribuciones del MACN, 6, 183–197.
Martinelli, A. G., Soares, M. B., & Schwanke, C. (2016). Two new cynodonts (Therapsida) from the Middle-Early Late Triassic of Brazil and comments on South American probainognathians. PLoS One, 11, e0162945.
Martinelli, A. G., Kammerer, C. F., Melo, T. P., Paes Neto, V. D., Ribeiro, A. M., Da-Rosa, A. A., Schultz, C. L., & Soares, M. B. (2017). The African cynodont Aleodon (Cynodontia, Probainognathia) in the Triassic of southern Brazil and its biostratigraphic significance. PLoS One, 12, e0177948.
Modesto, S. P. (1995). The skull of the herbivorous synapsid Edaphosaurus boanerges from the Lower Permian of Texas. Palaeontology, 38, 213.
Ranivoharimanana, L., Kammerer, C. F., Flynn, J. J., & Wyss, A. R. (2011). New material of Dadadon isaloi (Cynodontia, Traversodontidae) from the Triassic of Madagascar. Journal of Vertebrate Paleontology, 31, 1292–1302.
Romer, A. S. (1970). The Chañares (Argentina) Triassic reptile fauna. VI. A chiniquodontid cynodont with incipient squamosal-dentary jaw articulation. Breviora. 344, 1–18.
Rubidge, B. S. (1990). Redescription of the cranial morphology of Eodicynodon oosthuizeni (Therapsida; Dicynodontia). Navorsinge van die Nasionale Museum: Researches of the National Museum, 7, 1–25.
Rybczynski, N., & Reisz, R. R. (2001). Earliest evidence for efficient oral processing in a terrestrial herbivore. Nature, 411, 684–687.
Reisz, R. R., Modesto, S. P., & Scott, D. (2022). Cranial anatomy of the caseid synapsid Cotylorhynchus romeri, a large terrestrial herbivore from the lower Permian of Oklahoma, USA. Frontiers in Earth Science, 10, 847560.
Sánchez-Villagra, M. R., & Sánchez, M. R. (2012). Embryos in deep time: the rock record of biological development. Univ of California Press.
Seeley, H. G. (1894). XIII. Researches on the structure, organization, and classification of the fossil reptilia. -Part IX., Section 3. On Diademodon. Philosophical Transactions of the Royal Society of London B, 185, 1029–1041
Sigogneau–Russell, D., & Russell, D. E. (1974). Étude du premier caséidé (Reptilia, Pelycosauria) d’Europe occidentale. Bulletin du Muséum national d'Histoire naturelle, 230, 145–216.
Tatarinov, L. P. (1968). Morphology and systematics of the northern Dvina cynodonts (Reptilia, Therapsida; Upper Permian). Peabody Museum of Natural History.
Wallace, R. V., Martínez, R., & Rowe, T. (2019). First record of a basal mammaliamorph from the early Late Triassic Ischigualasto Formation of Argentina. PLoS One, 14, e0218791.
Watson, D. M. S. (1931, September). 55. On the Skeleton of a Bauriamorph Reptile. In Proceedings of the Zoological Society of London (Vol. 101, No. 3, pp. 1163-1205). Oxford, UK: Blackwell Publishing Ltd.
Weide, D. M., Sidor, C. A., Angielczyk, K. D., & Smith, R. M. (2009). A new record of Procynosuchus delaharpeae (Therapsida: Cynodontia) from the upper Permian Usili Formation, Tanzania. Palaeontologia Africana, 44, 21–26.
