# Supplementary material for: Evolution of tooth morphological complexity and its association with the position of tooth eruption in the jaw in non-mammalian synapsids
Source: PeerJ. 2024 Aug 12;12:e17784. doi: 10.7717/peerj.17784 (PMC11326432; doi:10.7717/peerj.17784)
Supplement: Supplemental Information 3 [file peerj-12-17784-s003.xlsx]

## Sheet: Dataset S2
Dataset S2
Data on measurements (mm) and tooth complexity level for synapsid taxa used in this study.
Length to dentition denotes the length from the anterior end of premaxilla to and the posterior end of the dentition.
Length to ante-palatine denotes the length from the anterior end of premaxilla to the anterior end of palatine.
Length to post-palatine denotes the length from the anterior end of premaxilla to the posterior end of palatine.
Length to post-maxilla denotes the length from the anterior end of premaxilla to the posterior end of maxilla.
Cranial length denotes the length from the anterior end of premaxilla to the posterior end of the cranium.
Taxon	Length to dentition	Length to ante-palatine	Length to post-palatine	Length to post-maxilla	Cranial length	Tooth complexity level
Aelurognathus tigriceps	93.0605	54.5589	129.359	150.48	271.919	1
Andescynodon mendozensis	38.241	32.2587	41.4777	42.4575	85.3059	5
Annatherapsidus petri	90.0004	51.3801	120.862	143.966	221.38	1
Anteosaurus	191.903	112.355	261.349	301.138	536.487	1
Arctognathus	125.928	89.2521	172.699	137.717	346.675	1
Bauria cynops	49.623	16.7791	55.0473	56.7463	108.382	3
Biarmosuchus tener	103.245	49.8916	79.6376	118.497	185.006	1
Bocatherium	26.1429	12.2857	31.1429	29.1429	48.4286	5
Brasilodon quadrangularis	17.9954	12.1354	18.7595	20.7658	37.1983	3
Chiniquodon	38.2046	15.104	42.5234	39.4392	76.8648	3
Clelandina rubidgei	92.1161	91.0772	195.312	207.087	358.074	1
Cotylorhynchus romeri	113.665	58.7673	105.529	125.599	197.232	1
Cynognathus	165.455	113.922	196.389	184.018	320.62	3
Dadadon isaloi	68.0281	38.453	77.3231	67.2018	133.109	5
Diademodon tetragonus	158.513	124.709	171.135	163.199	298.197	5
Dicynodon	68.8976	77.9468	129.917	116.603	232.046	1
Dimetrodon limbatus	236.38	109.717	232.505	270.556	391.686	1
Dinogorgon rubidgei	84.8253	55.3208	124.369	151.21	258.574	1
Dvinia prima	42.0437	28.4118	42.7056	44.9877	85.9217	5
Edaphosaurus boanerges	75.7326	40.5484	76.8787	77.1988	144.4	1
Eodicynodon oosthuizeni	26.5469	24.1657	54.4043	35.3567	91.9051	1
Ericiolacerta parva	16.0223	12.469	22.8034	28.6033	45.535	2
Estemmenosuchus uralensis	249.807	109.026	289.782	298.144	510.729	1
Euromycter rutenus	57.9514	11.4687	69.568	62.6633	100.002	1
Exaeretodon riograndensis	116.368	67.5814	117.24	132.499	286.307	5
Glanosuchus	122.662	40.886	138.007	165.158	295.196	1
Gorgonops torvus	72.0244	55.2453	105.363	105.933	215.662	1
Hadrocodium wui	4.63303	3.37649	4.61362	4.77353	9.95426	3
Haldanodon exspectatus	185.073	142.359	209.727	188.547	337.501	5
Ictidosuchops intermedius	41.4028	33.8409	59.8743	62.101	99.5227	1
Inostrancevia alexandri	81.1905	61.4292	104.286	125	215.001	1
Jonkeria	314.564	161.875	292.495	382.874	586.115	1
Karenites ornamentatus	36.6667	21.1111	46.8254	54.2857	89.3651	2
Kayentatherium	106.688	64.6463	141.014	117.491	213.933	5
Leontosaurus vanderhorsti	153.846	101.737	208.932	240.198	396.029	1
Lumkuia fuzzi	23.8844	15.9235	23.758	26.0507	56.4333	3
Massetognathus ochagaviae	69.6709	59.1719	91.1999	73.8757	127.483	5
Morganucodon	13.2177	9.1541	16.1365	13.9096	24.3546	3
Moschorhinus kitchingi	80.877	60.8763	121.17	135.867	250.551	1
Oligokyphus major	52.71	36.0926	57.2388	53.0205	86.9784	5
Pachygenelus	32.9251	19.3386	35.7997	33.9631	59.3036	4
Pascualgnathus polanskii	62.3589	33.5339	51.7747	64.8571	129.714	4
Probainognathus jenseni	25.826	17.827	29.3914	27.218	64.522	3
Procynosuchus delaharpeae	53.9855	36.2562	61.4901	57.7233	108.913	3
Pseudotherium argentinus	20.5652	14.5656	22.7319	NA †	46.9719	4
Rubidgea atrox	130.204	90.1032	204.96	222.783	375.265	1
Ruhuhucerberus haughtoni	144.659	97.1404	188.393	230.025	362.489	1
Sauroctonus progressus	80.6237	60.6691	103.927	124.286	214.286	1
Sinoconodon	24.3703	17.1851	27.8517	26.8517	51.4072	2
Smilesaurus ferox	117.276	90.4392	152.349	198.767	300.332	1
Styracocephalus	130.932	52.3736	135.19	157.776	335.188	1
Suminia getmanovi	28.2435	13.3104	32.054	32.3214	55.7181	2
Sycosaurus laticeps	94.5553	55.605	130.819	148.011	202.542	1
Sycosaurus nowaki	119.79	75.8998	167.31	194.7	318.779	1
Tetraceratops insignis	52.2902	27.4995	53.9585	53.471	95.6948	1
Theriognathus	15.8924	22.3901	41.5076	40.8687	74.559	1
Thrinaxodon liorhinus	27.5034	19.1519	29.7692	29.8767	65.2186	3
Ulemosaurus svijagensis	181.581	98.2476	184.689	207.501	338.538	2
Viatkosuchus sumini	60.7045	35.5292	91.2356	94.6279	166.76	1
Yunnanodon	14.7586	10.8966	14.2069	NA †	32	5
† Data were not available because the position of the posterior end of maxilla could not be identified in the available illustrations.
