# Supplementary material for: Evolution of tooth morphological complexity and its association with the position of tooth eruption in the jaw in non-mammalian synapsids
Source: PeerJ journal article supplement (doi:10.7717/peerj.17784), 2024-08-12
Supplement: TableS1.pdf [file TableS1.pdf]

Supplementary Information for:

Evolution of tooth morphological complexity and its association with the position of tooth eruption in the jaw in non-mammalian synapsids

**Table S1: Estimates of phylogenetic generalized least squares (PGLS) models used to quantify the positioning of dentition in the upper jaw or cranium for the ancestral state reconstructions in non-mammalian synapsids.**

| Explanatory variable                                             | Estimate | SE    | t      | P       |
|------------------------------------------------------------------|----------|-------|--------|---------|
| (a) Dentition position relative to the anterior end of palatine  |          |       |        |         |
| Intercept                                                        | 1.096    | 0.243 | 4.506  | < 0.001 |
| Length to ante-palatine                                          | 0.902    | 0.057 | 15.958 | < 0.001 |
| (b) Dentition position relative to the posterior end of palatine |          |       |        |         |
| Intercept                                                        | 0.001    | 0.209 | 0.004  | 0.997   |
| Length to post-palatine                                          | 0.986    | 0.037 | 26.747 | < 0.001 |
| (c) Dentition position relative to the posterior end of maxilla  |          |       |        |         |
| Intercept                                                        | -0.085   | 0.182 | -0.467 | 0.642   |
| Length to post-maxilla                                           | 0.994    | 0.033 | 29.857 | < 0.001 |
| (d) Dentition position in the cranium                            |          |       |        |         |
| Intercept                                                        | -0.851   | 0.225 | -3.780 | < 0.001 |
| Cranial length                                                   | 1.041    | 0.038 | 27.284 | < 0.001 |

(a) The dentition position relative to the anterior end of palatine was calculated as residuals from the regression of the length to post-dentition (log) on the length to ante-palatine (log) (see Fig. 2 for definitions of positions and length measurements). An estimated  $\lambda$  of 0.527 was used in the PGLS model. (b) The dentition position relative to the posterior end of palatine was calculated as residuals from the regression of the length to post-dentition (log) on the length to post-palatine (log). An estimated  $\lambda$  of 0.928 was used in the PGLS model. (c) The dentition position relative to the posterior end of maxilla was calculated as residuals from the regression of the length to post-dentition (log) on the length to post-maxilla (log). An estimated  $\lambda$  of 0.865 was used in the PGLS model. (d) The dentition position in the cranium was calculated as residuals from the regression of the length to post-dentition (log) on the cranial length (log). An estimated  $\lambda$  of 0.879 was used in the PGLS model.
